# Supplementary material for: Pyroelectric and second harmonic responses from LiTaO3 nanocrystallites evolved in a Li2O–B2O3–Ta2O5 glass system
Source: Royal Society of Chemistry journal article supplement (doi:10.1039/c4ce02412e), 2015-01-01
Supplement: c4ce02412e1.pdf [file c4ce02412e1.pdf]

Supplementary Information for

## Pyroelectric and Second Harmonic Response from LiTaO<sub>3</sub> Nanocrystallites Evolved in Li<sub>2</sub>O–B<sub>2</sub>O<sub>3</sub>–Ta<sub>2</sub>O<sub>5</sub> Glass System

P.W. Jaschin and K.B.R. Varma\*

*Materials Research Centre, Indian Institute of Science, Bangalore-560012, India.*

*E-mail: kbrvarma@mrc.iisc.ernet.in; Fax: +91 80 2360 0683; Tel: +91 080 2293 2914*

**P vs E Hysteresis Loop**

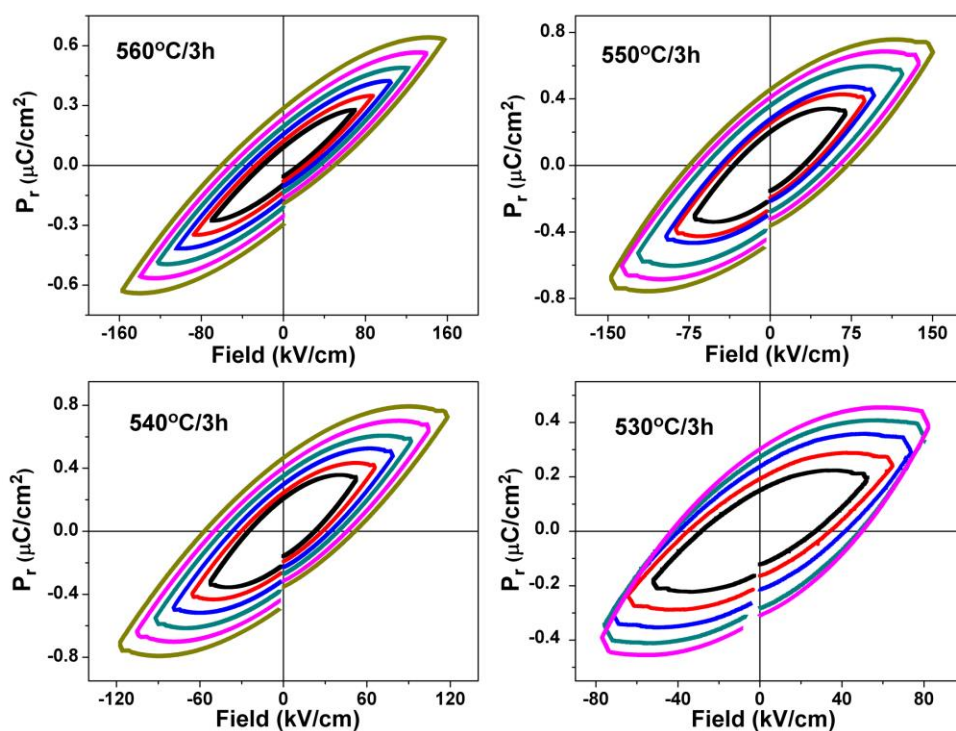

**Fig. S1** Ferroelectric hysteresis loops for heat-treated samples of 1.5Li<sub>2</sub>O–2B<sub>2</sub>O<sub>3</sub>–0.5Ta<sub>2</sub>O<sub>5</sub>

## UV-Vis Transmission Spectra

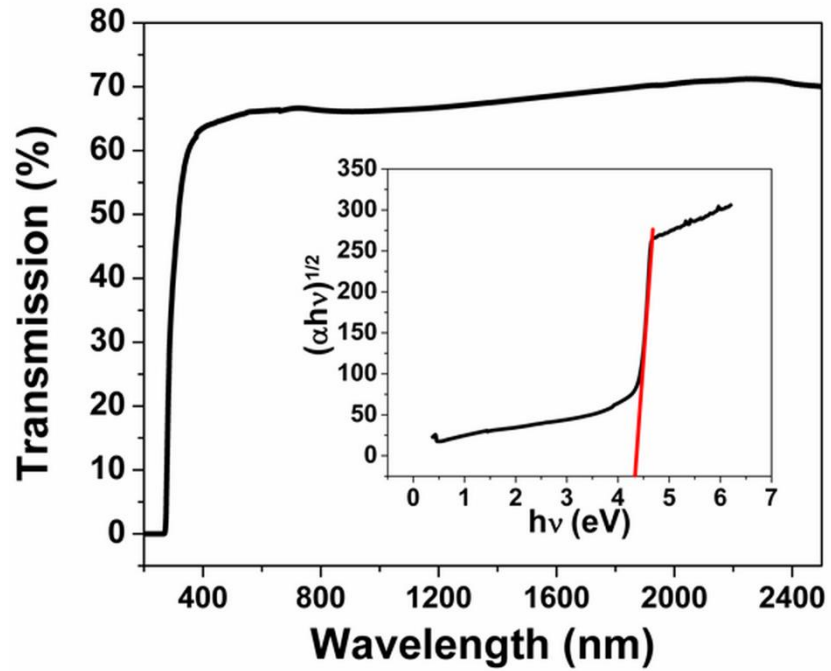

**Fig S2** UV-Vis transmission spectra recorded for the as-quenched glass of  $1.5\text{Li}_2\text{O}-2\text{B}_2\text{O}_3-0.5\text{Ta}_2\text{O}_5$ ; Inset shows the plot of  $(\alpha h\nu)^{1/2}$  vs  $h\nu$ .
